# Supplementary material
Source: MDPI journal article supplement (https://www.mdpi.com/2071-1050/9/4/554)
Supplement: s1 [file s1]

Archive with 2 entries (2 files):
- S2 sustainability-178624-supplementary Information.pdf
- S1 sustainability-178624-supplementary information v02.pdf
