# Supplementary material
Source: MDPI journal article supplement (https://www.mdpi.com/2071-1050/9/4/554)
Supplement: s1 [file s1 › S2 sustainability-178624-supplementary Information.pdf]

## Digital threat and vulnerability management: The SVIDT method

### Disciplines explaining rationales and drivers of different human systems

Table S2: Levels of human systems and (primary) scientific disciplines for modeling and explaining drivers and rationales of these systems

| Level of human system                   | Primary social science providing explanations about rationales                                                                              |
|-----------------------------------------|---------------------------------------------------------------------------------------------------------------------------------------------|
| Human species                           | Anthropology                                                                                                                                |
| Supranational systems                   | International policy                                                                                                                        |
| Society                                 | Sociology<br>1. Economics<br>2. Political Science<br>3. Cultural Ecology / Ecological anthropology<br>4. Sociology of science, epistemology |
| Institution                             | Administrative science                                                                                                                      |
| Organization<br>(companies, NGOs, etc.) | Business sciences, organizational science, industrial ecology (as an engineering science)                                                   |
| Group                                   | Social psychology, microsociology, experimental economics                                                                                   |
| <b>Individual</b>                       | Psychology                                                                                                                                  |
| Organ                                   | Medicine                                                                                                                                    |
| Cell                                    | Cell-biology                                                                                                                                |
| Gene                                    | Molecular-genetics                                                                                                                          |
| Molecules                               | Biochemistry                                                                                                                                |
